# Supplementary material for: Stress response of Escherichia coli to essential oil components – insights on low-molecular-weight proteins from MALDI-TOF
Source: PubMed Central journal article supplement (PMC6115441; doi:10.1038/s41598-018-31255-2), 2018-08-29

## **Stress response of *Escherichia coli* to essential oil components – insights on low-molecular-weight proteins from MALDI-TOF**

Matěj Božik<sup>1</sup>, Pavel Cejnar<sup>2,3</sup>, Martina Šašková<sup>1</sup>, Pavel Nový<sup>1</sup>, Petr Maršík<sup>1</sup>, Pavel Klouček<sup>1\*</sup>

<sup>1</sup> *Czech University of Life Sciences, Faculty of Agrobiological Sciences, Department of Quality of Agricultural Products, Prague, Czech Republic*

<sup>2</sup> *University of Chemistry and Technology, Department of Computing and Control Engineering, Prague, Czech Republic*

<sup>3</sup> *Czech University of Life Sciences, Faculty of Agrobiological Sciences, Department of Plant Protection, Prague, Czech Republic*

\* Corresponding author.

E-mail address: [kloucek@af.czu.cz](mailto:kloucek@af.czu.cz)

**Supplementary Table S1**Minimum inhibitory concentrations of tested compounds against *E. coli* by the microdilution method

| <b>Compound</b>                              | <b>CAS No.</b>     | <b>MIC<br/>[<math>\mu</math>L/L]</b> |
|----------------------------------------------|--------------------|--------------------------------------|
| Carvacrol <sup>a</sup>                       | 499-75-2           | 256                                  |
| trans-Cinnamaldehyde <sup>a</sup>            | 14371-10-9         | 256                                  |
| Eugenol <sup>a</sup>                         | 97-53-0            | 512                                  |
| (-)-Carvone <sup>a</sup>                     | 6485-40-1          | 1024                                 |
| (+)- $\alpha$ -pinene <sup>a</sup>           | 7785-70-8          | 1024                                 |
| ( $\pm$ )- $\beta$ -Citronellol <sup>a</sup> | 106-22-9           | 1024                                 |
| (1S)-(+)-3-Carene <sup>a</sup>               | 498-15-7           | 1024                                 |
| Thymol <sup>a</sup>                          | 89-83-8            | 1024                                 |
| 4-Carvomenthenol <sup>a</sup>                | 562-74-4           | 2048                                 |
| Citral <sup>a</sup>                          | 5392-40-5          | 2048                                 |
| Geraniol <sup>a</sup>                        | 106-24-1           | 2048                                 |
| Guaiacol <sup>a</sup>                        | 90-05-1            | 2048                                 |
| 4-Allylanisole                               | 140-67-0           | >2048                                |
| Allyl disulfide                              | 2179-57-9          | >2048                                |
| trans-Anethole                               | 4180-23-8          | >2048                                |
| Anisole                                      | 100-66-3           | >2048                                |
| (-)-Bornyl acetate                           | 5655-61-8          | >2048                                |
| (-)- $\alpha$ -Bisabolol                     | 23089-26-1         | >2048                                |
| Butyl isothiocyanate                         | 592-82-5           | >2048                                |
| $\beta$ -Caryophyllene                       | 87-44-5            | >2048                                |
| (-)-trans-Caryophyllene                      | 87-44-5            | >2048                                |
| Cedrol                                       | 77-53-2            | >2048                                |
| Cineole                                      | 470-82-6           | >2048                                |
| ( $\pm$ )-Citronellal                        | 106-23-0           | >2048                                |
| Citronellyl propionate                       | 141-14-0           | >2048                                |
| p-Cymene                                     | 99-87-6            | >2048                                |
| 2-Decanol                                    | 1120-06-05         | >2048                                |
| D-Dihydrocarvone                             | 7764-50-3          | >2048                                |
| Farnesene                                    | mixture of isomers | >2048                                |
| (+)-Fenchone                                 | 4695-62-9          | >2048                                |
| Geranyl acetate                              | 105-87-3           | >2048                                |
| Hexyl hexanoate                              | 6378-65-0          | >2048                                |
| (-)-Isopulegol                               | 89-79-2            | >2048                                |
| (R)-(+)-Limonene                             | 5989-27-5          | >2048                                |
| (-)-Linalool                                 | 126-91-0           | >2048                                |
| (-)-Menthone                                 | 14073-97-3         | >2048                                |
| (-)- $\beta$ -Pinene                         | 18172-67-3         | >2048                                |
| $\alpha$ -Phellandrene                       | 99-83-2            | >2048                                |
| (+)-Rose oxide                               | 16409-43-1         | >2048                                |
| $\alpha$ -Terpinene                          | 99-86-5            | >2048                                |
| $\gamma$ -Terpinene                          | 99-85-4            | >2048                                |
| Terpinolene                                  | 586-62-9           | >2048                                |

<sup>a</sup> substances included in stress response analysis

### Supplementary Figure S2

Principal component analysis of the average spectra for each time and treatment – samples scores plot for PC1×PC2 projection (top) and PC1×PC3 projection (bottom). Samples from 0, 90 and 120 minutes were included.

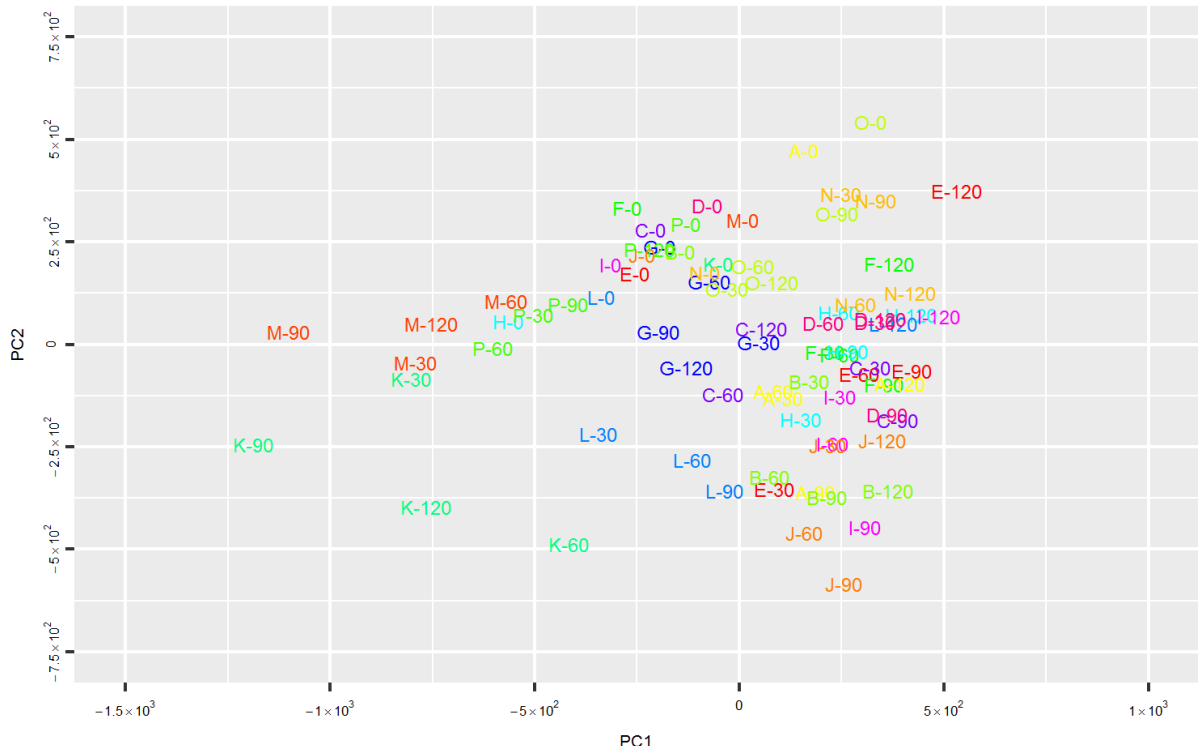

Chemicals: A Citronellol E Thymol I Carvomenthenol M Tetracycline  
 B Citral F Carvacrol J Carvone N Chlorine  
 C Eugenol G α-Pinene K Guaiacol O Peroxide  
 D Geraniol H Cinnamaldehyde L Carene P Positive Control

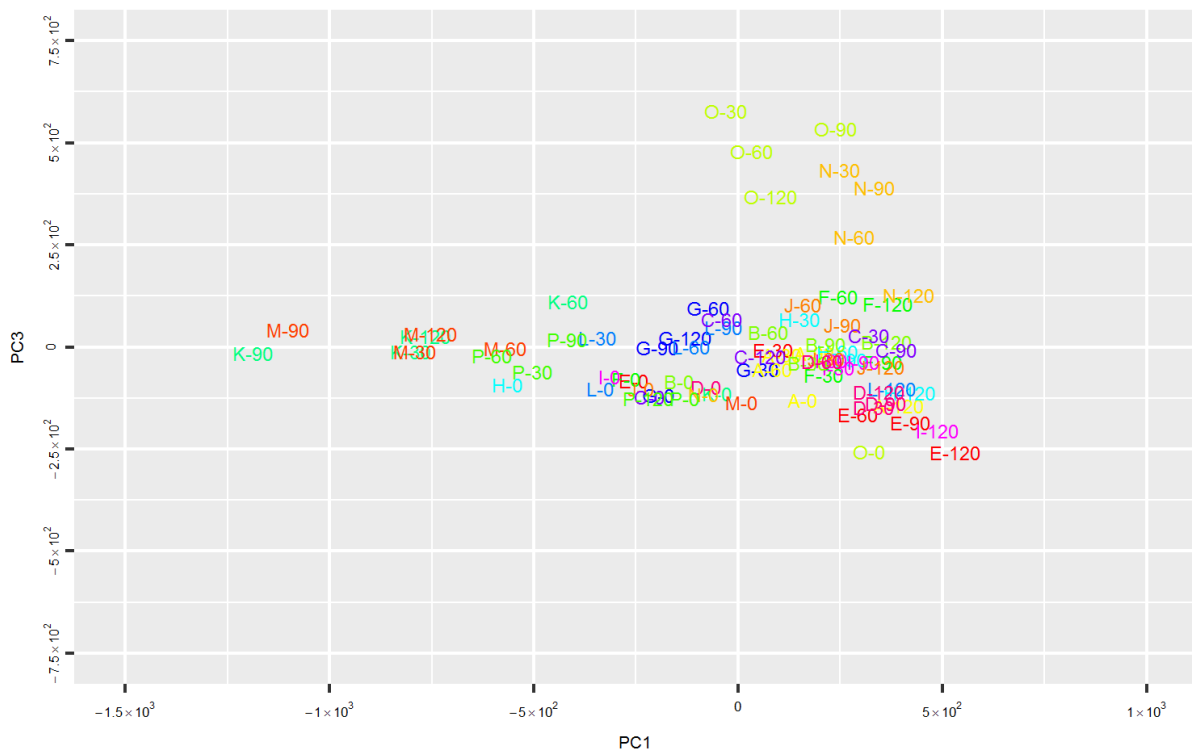

Supplement: 41598_2018_31255_MOESM1_ESM.pdf [file 41598_2018_31255_MOESM1_ESM.pdf]
